# Supplementary material for: CALR mutations in a cohort of JAK2 V617F negative patients with suspected myeloproliferative neoplasms
Source: PubMed Central journal article supplement (PMC6934448; doi:10.1038/s41598-019-56236-x), 2019-12-27
Supplement: 41598_2019_56236_MOESM1_ESM.pdf [file 41598_2019_56236_MOESM1_ESM.pdf]

# *CALR* mutations in a cohort of *JAK2* V617F negative patients with suspected myeloproliferative neoplasms

Authors: Tanja Belcic Mikic<sup>1,2,\*</sup>, Tadej Pajic<sup>1,3</sup>, Matjaz Sever<sup>1,2</sup>

1 Department of Haematology, University Medical Centre Ljubljana, Zaloska 7, 1000 Ljubljana, Slovenia

2 Faculty of Medicine, University of Ljubljana, Korytkova 2, 1000 Ljubljana, Slovenia

3 Faculty of Medicine, University of Maribor, Taborska ulica 8, 2000 Maribor, Slovenia

\* ORCID ID [0000-0002-0092-5682](https://orcid.org/0000-0002-0092-5682)

Correspondence:

Tanja Belcic Mikic, MD

Department of Haematology, University Medical Centre Ljubljana, Zaloska 7, 1000 Ljubljana, Slovenia

Faculty of Medicine, University of Ljubljana, Korytkova 2, 1000 Ljubljana, Slovenia

email: [tbelcic@gmail.com](mailto:tbelcic@gmail.com)

telephone number: +38640500289

Supplementary Table S1: The list of diagnosis in myeloproliferative neoplasm (MPN) suspected patients

| <i>Diagnosis</i>                                                              | <i>No. of patients</i> |
|-------------------------------------------------------------------------------|------------------------|
| <i>Secondary/reactive erythrocytosis/leucocytosis/thrombocytosis</i>          | 380                    |
| <i>ET* (by WHO** criteria 2008)</i>                                           | 10                     |
| <i>Primary myelofibrosis (by WHO** criteria 2008)</i>                         | 4                      |
| <i>Suspected clonal ET*</i>                                                   | 32                     |
| <i>Myelodysplastic syndrome</i>                                               | 8                      |
| <i>Mastocytosis</i>                                                           | 3                      |
| <i>Haemochromatosis</i>                                                       | 2                      |
| <i>Anaemia (Chronic inflammatory, iron deficiency, aplastic, thalassemia)</i> | 15                     |
| <i>Splenomegaly - unclassifiable</i>                                          | 5                      |
| <i>Hypersplenism</i>                                                          | 3                      |
| <i>Chronic lymphocytic leukaemia</i>                                          | 3                      |
| <i>Haemophilia</i>                                                            | 2                      |
| <i>Eosinophilia</i>                                                           | 6                      |
| <i>MPN-unclassifiable (by WHO** criteria 2008)</i>                            | 10                     |
| <i>Polycythaemia vera (by WHO** criteria 2008)</i>                            | 1                      |
| <i>Suspected primary polycythaemia</i>                                        | 10                     |
| <i>Lymphoma</i>                                                               | 7                      |
| <i>Acute myeloid leukaemia</i>                                                | 4                      |
| <i>Chronic myelomonocytic leukaemia</i>                                       | 2                      |
| <i>Thrombocytopenia - undetermined</i>                                        | 9                      |
| <i>Portal vein thrombosis</i>                                                 | 1                      |
| <i>Chronic neutrophilic leukemia (by WHO** criteria 2008)</i>                 | 1                      |
| <i>MDS/MPN--unclassifiable</i>                                                | 2                      |
| <i>Other #</i>                                                                | 4                      |

\*essential thrombocythemia, \*\*World Health Organisation, # secondary myelofibrosis, monoclonal gammopathy of undetermined significance, leukopenia due to toxic effect of drugs, diagnosis not found.
